# Supplementary material for: Fast and stable charge transfer at the lithium–sulfide (electrolyte) interface via an in situ solidified Li+-conductive interlayer
Source: Royal Society of Chemistry journal article supplement (doi:10.1039/d3qm00049d), 2023-01-01
Supplement: d3qm00049d1.pdf [file d3qm00049d1.pdf]

## Supplementary Information

### Fast and Stable Charge Transfer at Lithium-Sulfide (Electrolyte) Interface via In-Situ Solidified Li<sup>+</sup>-Conductive Interlayer

Ya-Hui Wang<sup>a,b</sup>, Xu-Sheng Zhang<sup>a,b</sup>, Cai-Cai Li<sup>a,b</sup>, Hao Zeng<sup>a,e</sup>, Zhe Chen<sup>c</sup>, Liang Zhang<sup>d</sup>, Jin-Chi Zheng<sup>d</sup>, Yuan Luo<sup>d</sup>, Sen Xin<sup>a,b,\*</sup>, Yu-Guo Guo<sup>a,b</sup>

<sup>a</sup> CAS Key Laboratory of Molecular Nanostructure and Nanotechnology, CAS Research/Education Center for Excellence in Molecular Sciences, Beijing National Laboratory for Molecular Sciences (BNLMS), Institute of Chemistry, Chinese Academy of Sciences (CAS), Beijing 100190, China;

<sup>b</sup> University of Chinese Academy of Sciences, Beijing 100049, China

<sup>c</sup> College of Environmental Science and Engineering, North China Electric Power University, Beijing, 102206, China.

<sup>d</sup> State Grid Xinjiang Company Limited Electric Power Research Institute, Xinjiang, 830013, China.

<sup>e</sup> Williston Northampton School, Easthampton, Massachusetts, 01027, United States.

#### Experimental section

##### Preparation of glassy 75Li<sub>2</sub>S-25P<sub>2</sub>S<sub>5</sub> (LPS) electrolyte powder

A certain amount of lithium sulfide (Li<sub>2</sub>S, Alfa Aesar, 99.9%) and phosphorus pentasulfide (P<sub>2</sub>S<sub>5</sub>, Macklin, 99%) was weighed according to the molar ratio of 75:25, placed in an agate mortar and hand-milled for 30 minutes, then poured into a ball mill jar for high-energy ball milling (Argon atmosphere 500 rpm) for 20 hours.

##### Preparation of precursor solution of Li<sup>+</sup>-conductive interlayer (LCI)

The precursor solution of LCI was made by dissolving 2 mol L<sup>-1</sup> lithium hexafluorophosphate (LiFP<sub>6</sub>; Alfa Aesar, 98%) and 1 mol L<sup>-1</sup> bis(trifluoromethane)sulfonimide lithium salt (LiTFSI; Sigma-aldrich 99.95% trace metals basis) into a 1, 3-dioxolane (DOL; Alfa Aesar, 99.5%, stab.) and 1, 2-dimethoxyethane (DME) (Alfa Aesar, 99+%) solvent (1:1, v/v) mixture. The decomposition of LiFP<sub>6</sub> triggers the ring-opening cationic polymerization of DOL monomer and thereby converting the precursor solution into LCI. All the preparation processes were conducted in an argon-filled glovebox (O<sub>2</sub> < 0.1 ppm, H<sub>2</sub>O < 0.1 ppm).

Assembly of symmetrical Li|LPS|Li, Li|LPS|SS, and blocking SS|LPS|SS batteries

About 150 mg of LPS powder was weighed and put into a homemade mold with a diameter of 10 mm and then cold pressed under 360 MPa for 5 minutes. And the Li foils ( $\Phi 12$ ) were placed on both sides of LPS pellet followed by cold pressing under 100 MPa for 3 minutes. Similarly, the assembly of Li|LPS|SS and blocking SS|LPS|SS cells was the same as above, except that the corresponding Li foils were replaced by stainless steels. All the assembled processes were conducted in an argon-filled glovebox ( $O_2 < 0.1$  ppm,  $H_2O < 0.1$  ppm).

Assembly of symmetrical Li|LCI-LPS-LCI|Li batteries

About 80 mg of LPS powder was weighed and put into a homemade mold with a diameter of 10 mm and then cold pressed under 360 MPa for 5 minutes. After that, 10  $\mu$ L precursor solution was injected into the interface between LPS pallet and Li foil. Subsequently, the assembled batteries were left to stand for a period of time to form LCI completely inside the battery. All the assembled processes were conducted in an argon-filled glovebox ( $O_2 < 0.1$  ppm,  $H_2O < 0.1$  ppm).

### Materials characterization

The X-ray diffraction (XRD) patterns were collected on a Bruker D8 Advance diffractometer with Cu  $K\alpha$  radiation ( $\lambda = 1.5418$  Å) in the  $2\theta$  range from  $10^\circ$  to  $80^\circ$  by using a sealed container to avoid oxygen. The Fourier Transform Infrared (FTIR) spectrum of the prepared LCI was recorded using VERTEX 70v in the range of 400 to 4000  $cm^{-1}$  to investigate the functional group of LCI. The morphology and element mapping were characterized by REGULUS SU8100 scanning electron microscopy (SEM) with an energy-dispersive X-ray spectroscopy (EDS) system. X-ray photoelectron spectroscopy (XPS) was recorded on AXIS Supra electron spectrometer using 150 W Al  $K\alpha$  radiation ( $h\nu = 1486.6$  eV).

### Electrochemical measurements

Electrochemical impedance spectroscopy (EIS) measurements were investigated over the frequency range from 1 MHz to 0.1 Hz with an amplitude of 10 mV on a Princeton PARSTAT MC 1000 multi-channel electrochemical workstation. The ionic conductivity  $\sigma$  was calculated based on the following equation,

$$\sigma = \frac{L}{R_{SSE} \times S}$$

where L is the thickness of electrolytes,  $R_{SSE}$  is the resistance according to the EIS measurement, S is the effective contact area between the electrolyte and stainless steel.

The activation energy ( $E_{a(SSE)}$ ) of the electrolyte was obtained according to the Arrhenius equation.

$$\sigma = \frac{A}{T} \exp\left(\frac{-E_a}{K_B T}\right)$$

where,  $\sigma$  (S cm<sup>-1</sup>) is the ionic conductivity of the electrolyte,  $A$  is the pre-exponential factor,  $T$  (K) is the thermodynamic temperature,  $K_B$  ( $1.38 \times 10^{-23}$  J K<sup>-1</sup>) is the Boltzmann constant,  $E_a$  (J mol<sup>-1</sup>) is the activation energy of the electrolyte.

In the temperature range of 0-80 °C, the ionic conductivity of the electrolyte was tested every 10 °C as an interval. The relationship between the ionic conductivity and temperature was drawn according to the Arrhenius equation, and the slope is  $E_{a(SSE)}$ .

The galvanostatic polarization and cycling measurements were conducted using a LAND battery test system (LANHE Inc. CT2001A). Galvanostatic cycling performance of Li|Li cells were tested with current density 0.1 mA cm<sup>-2</sup> corresponding to areal capacity of 0.1 mAh cm<sup>-2</sup>. For the critical current density tests, the initial current density is 0.1 mA cm<sup>-2</sup>, the deposited capacity is 0.1 mAh cm<sup>-2</sup>. After that, Li plating and stripping was tested at a fixed capacity of 0.1 mAh cm<sup>-2</sup> but a step-increased current density from 0.1 mA cm<sup>-2</sup> to 5 mA cm<sup>-2</sup>.

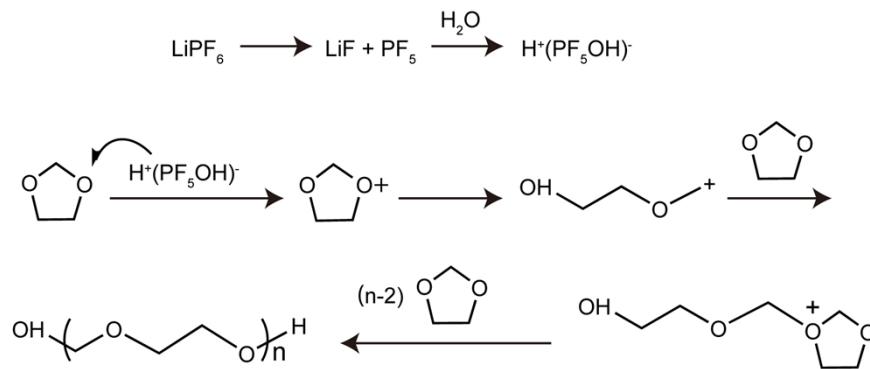

**Figure S1.** The polymerization mechanism of LCI.

**Table S1.** The specific values of resistances and the calculation result of ionic conductivity of Figure 2C.

|         | Thickness<br>(cm) | Effective area<br>(cm <sup>2</sup> ) | R <sub>SSE</sub><br>(Ω) | Ionic conductivity<br>(mS cm <sup>-1</sup> ) |
|---------|-------------------|--------------------------------------|-------------------------|----------------------------------------------|
| LPS     | 0.295             | 1.13                                 | 933                     | 0.28                                         |
| LPS/LCI | 0.310             | 1.13                                 | 671                     | 0.41                                         |

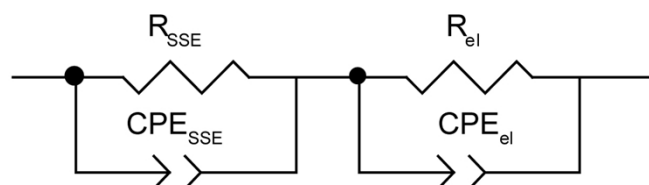

**Figure S1.** Detailed equivalent circuit of Figure 2C, where R<sub>SSE</sub> is the resistance of LPS powder and R<sub>el</sub> is the resistance of blocking electrode. Each constant phase element (CPE) describes the capacitance of the corresponding process.

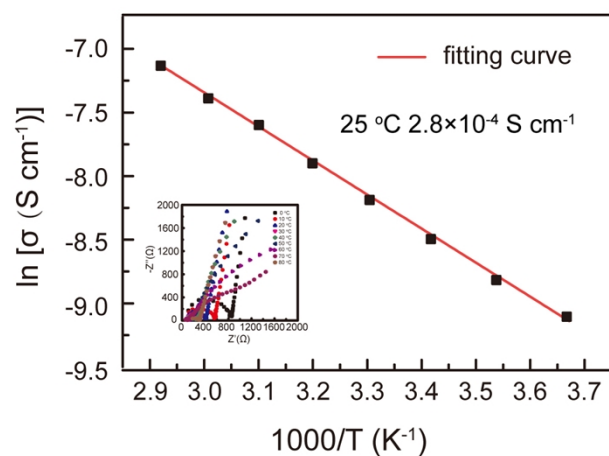

**Figure S2.** Arrhenius curve of ionic conductivity of glassy  $75\text{Li}_2\text{S}-25\text{P}_2\text{S}_5$  electrolyte; Inset: EIS spectra of glassy  $75\text{Li}_2\text{S}-25\text{P}_2\text{S}_5$  electrolyte at different temperatures.

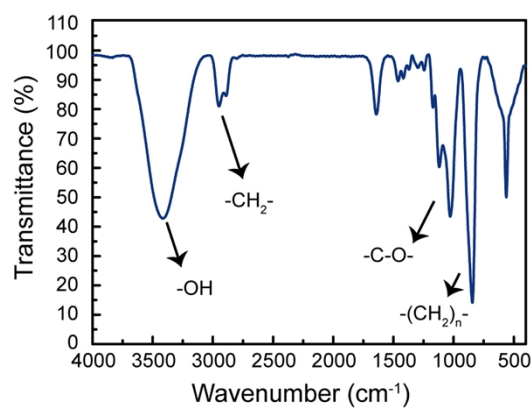

**Figure S3.** FTIR spectrum of LCI.

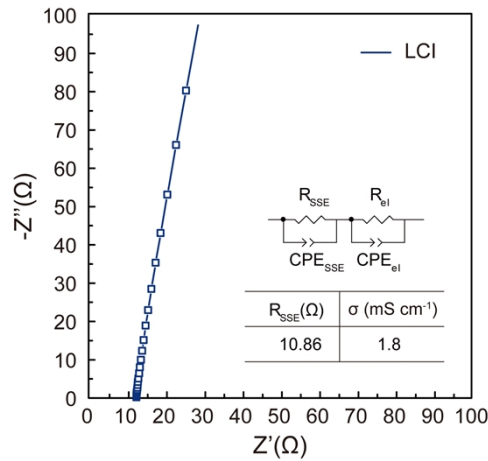

**Figure S4.** EIS spectrum of LCI.

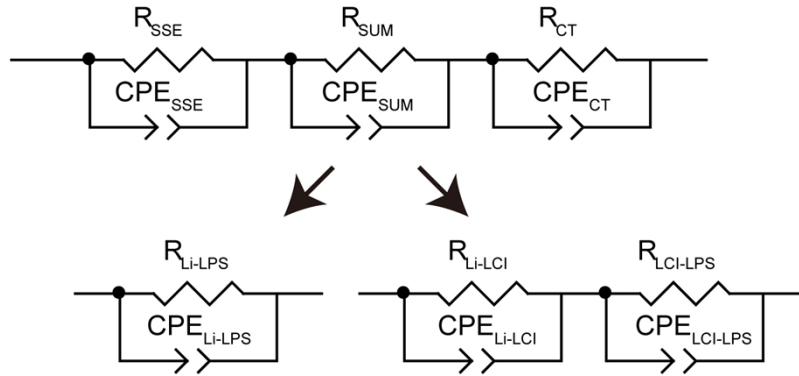

**Figure S5.** Detailed equivalent circuit of Figure 4c, d, where  $R_{SSE}$  is the resistance of LPS,  $R_{Li-LPS}$ ,  $R_{Li-LCI}$ ,  $R_{LCI-LPS}$  is the Li/LPS, Li/LCI, LCI/LPS interphase resistance, respectively.  $R_{CT}$  is the electrochemical transfer polarization resistance of Li plating/stripping. Each constant phase element (CPE) describes the capacitance of the corresponding process.

**Table S2.** The specific values of resistances in Figure S6.

|                                      | $R_{sse}$ ( $\Omega$ ) | $R_{SUM}$ ( $\Omega$ ) | $R_{CT}$ ( $\Omega$ ) |
|--------------------------------------|------------------------|------------------------|-----------------------|
| Li LPS Li<br>Before cycle            | 298.9                  | 178.2                  | 149.5                 |
| Li LPS Li<br>After 30 cycles         | -                      | -                      | -                     |
| Li LCI-LPS-LCI Li<br>Before cycle    | 303.3                  | 92.4                   | 208.2                 |
| Li LCI-LPS-LCI Li<br>After 30 cycles | 301.4                  | 184.5                  | 168.3                 |

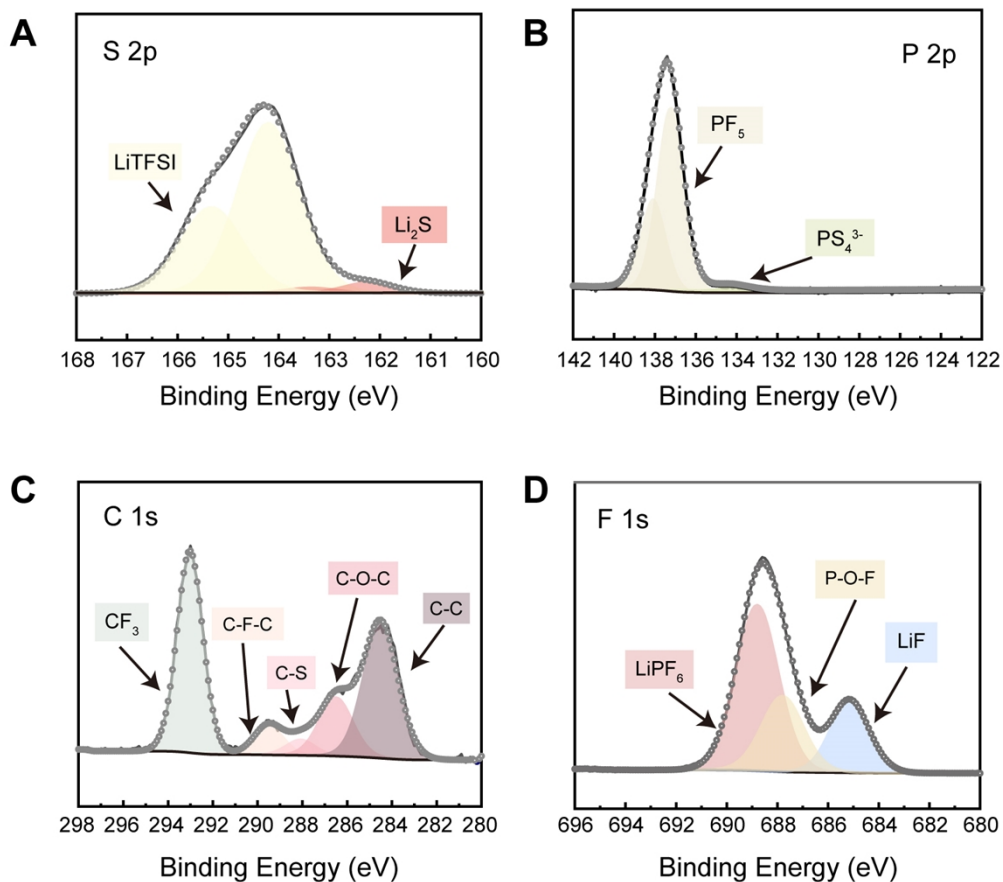

**Figure S6.** XPS spectrum of the Li anode recovered from Li|LCI-LPS-LCI|Li battery before cycling.

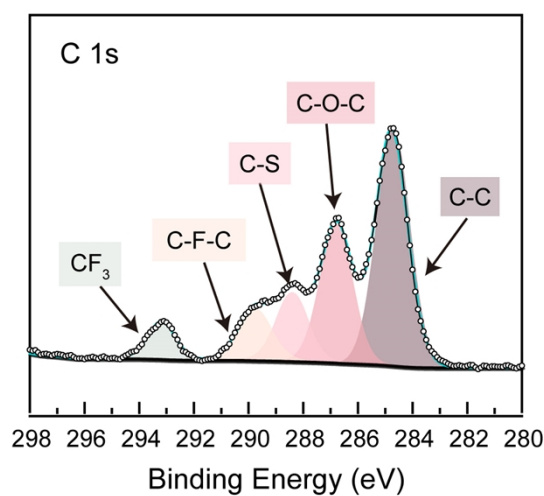

**Figure S7.** C 1s XPS spectrum of the cycled Li anode recovered from Li|LCI-LPS-LCI|Li battery. The battery is tested for 30 cycles at a current density of  $0.1 \text{ mA cm}^{-2}$  for  $0.1 \text{ mAh cm}^{-2}$

at room temperature.

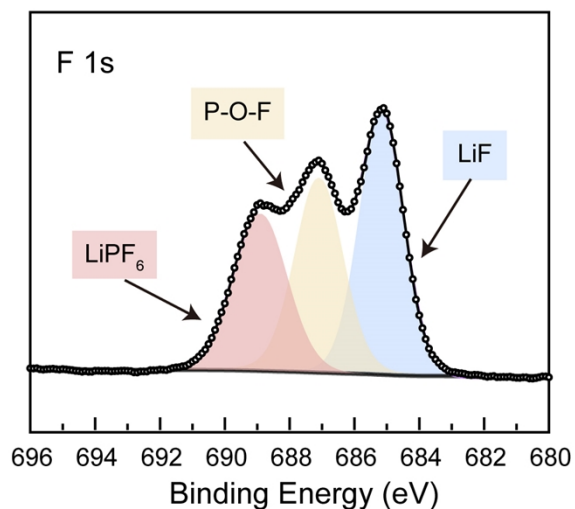

**Figure S8.** F 1s XPS spectrum of the cycled Li anode recovered from Li|LCI-LPS-LCI|Li battery. The battery is tested for 30 cycles at a current density of 0.1 mA cm<sup>-2</sup> for 0.1 mAh cm<sup>-2</sup> at room temperature.

**Table S3.** XPS binding energies with attributed species shown in Figure 5, S8.

| Spectra details | Binding energy (eV) |        | Attributed species                          |
|-----------------|---------------------|--------|---------------------------------------------|
| P 2p            | 131.70              | 132.57 | P <sub>2</sub> S <sub>7</sub> <sup>4-</sup> |
|                 | 134.19              | 135.06 | PS <sub>4</sub> <sup>3-</sup>               |
|                 | 137.05              | 137.92 | PF <sub>5</sub>                             |
|                 | 125.82              | 126.69 | Li <sub>3</sub> P                           |
| S 2p            | 163.02              | 164.18 | LiTFSI                                      |
|                 | 161.56              | 162.72 | PS <sub>4</sub> <sup>3-</sup>               |
|                 | 159.85              | 161.01 | Li <sub>2</sub> S                           |

**Table S4.** XPS binding energies with attributed species shown in Figure S6, S7, S8.

| Spectra details | Binding energy (eV) |  | Attributed species |
|-----------------|---------------------|--|--------------------|
| C 1s            | 284.77              |  | C-C                |
|                 | 286.79              |  | C-O-C              |
|                 | 288.40              |  | S-C                |
|                 | 289.78              |  | C-F-C              |
|                 | 293.19              |  | CF <sub>3</sub>    |
| F 1s            | 685.13              |  | LiF                |
|                 | 687.10              |  | P-O-F              |
|                 | 688.95              |  | LiPF <sub>6</sub>  |
